# Supplementary material for: Manual Acupuncture or Combination with Vitamin B to Treat Diabetic Peripheral Neuropathy: A Systematic Review and Meta‐Analysis of Randomized Controlled Trials
Source: Hindawi journal article supplement (doi:10.1155/2020/4809125), 2020-01-01

Meta-analysis estimates, given named study is omitted

| Lower CI Limit

○ Estimate

| Upper CI Limit

Zhao (2007)

Ji (2010)

Fei (2011)

0.05

0.27

0.56

0.84

1.06

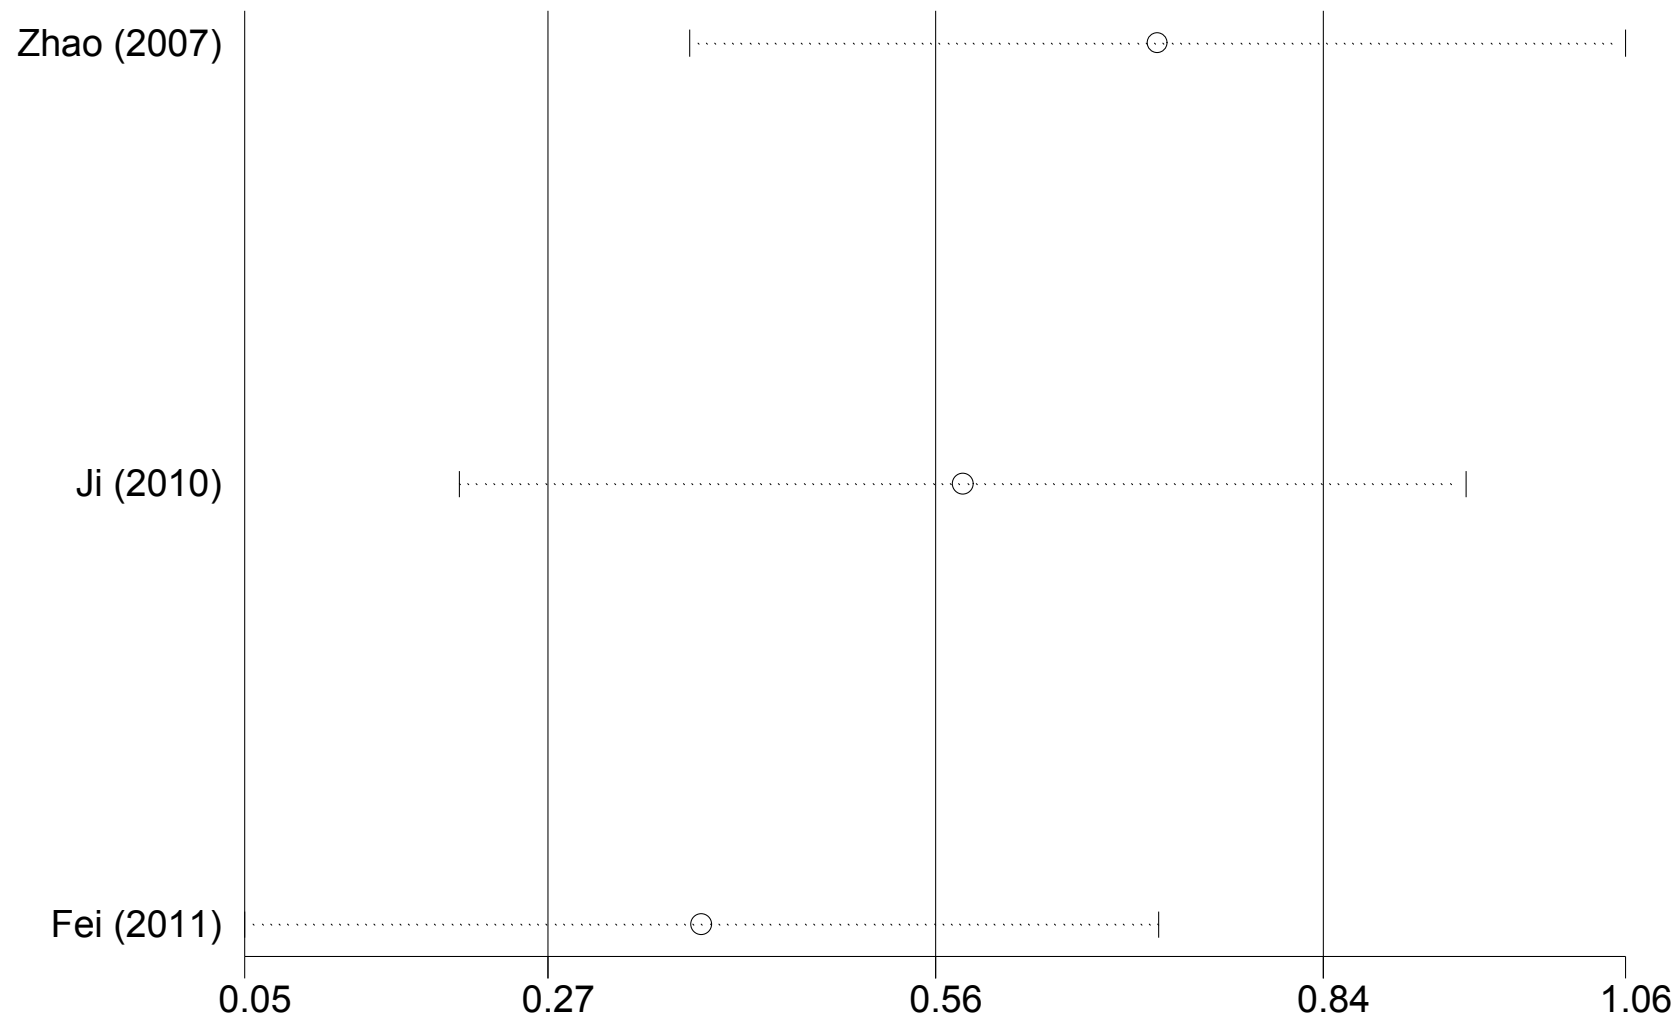

Supplement: f1 [file 4809125.f1.zip]
